# Long-Term Treatment of Thalidomide Ameliorates Amyloid-Like Pathology through Inhibition of $\beta$ -Secretase in a Mouse Model of Alzheimer's Disease

Ping He<sup>1</sup>, Xin Cheng<sup>2</sup>, Matthias Staufenbiel<sup>3</sup>, Rena Li<sup>4</sup>, Yong Shen<sup>1,2\*</sup>

**1** Center for Advanced Therapeutic Strategies of Brain Disorders, Roskamp Institute, Sarasota, Florida, United States of America, **2** Department of Neurology and Institute of Neurology, Huashan Hospital, Fudan University, Shanghai, China, **3** Novartis Pharm Ltd., Nervous System Research, Basel, Switzerland, **4** Center for Hormone Advanced Science and Education, Roskamp Institute, Sarasota, Florida, United States of America

## Abstract

Thalidomide is a tumor necrosis factor alpha (TNF $\alpha$ ) inhibitor which has been found to have abilities against tumor growth, angiogenesis and inflammation. Recently, it has been applied in clinic for the treatment of multiple myeloma as well as some inflammatory diseases. However, whether thalidomide has any therapeutic effects on neurodegenerative disorders, i.e. Alzheimer's disease (AD) is not clear. AD is characterized by excessive amount of amyloid  $\beta$  peptides (A $\beta$ ), which results in a significant release of inflammatory factors, including TNF $\alpha$  in the brain. Studies have shown that inhibition of TNF $\alpha$  reduces amyloid-associated pathology, prevents neuron loss and improves cognition. Our recent report showed that genetic inhibition of TNF $\alpha$ /TNF receptor signal transduction down-regulates  $\beta$  amyloid cleavage enzyme 1 (BACE1) activity, reduces A $\beta$  generation and improves learning and memory deficits. However, the mechanism of thalidomide involving in the mitigation of AD neuropathological features remains unclear. Here, we chronically administrated thalidomide on human APPswedish mutation transgenic (APP23) mice from 9 months old (an onset of A $\beta$  deposits and early stage of AD-like changes) to 12 months old. We found that, in addition of dramatic decrease in the activation of both astrocytes and microglia, thalidomide significantly reduces A $\beta$  load and plaque formation. Furthermore, we found a significant decrease in BACE1 level and activity with long-term thalidomide application. Interestingly, these findings cannot be observed in the brains of 12-month-old APP23 mice with short-term treatment of thalidomide (3 days). These results suggest that chronic thalidomide administration is an alternative approach for AD prevention and therapeutics.

**Citation:** He P, Cheng X, Staufenbiel M, Li R, Shen Y (2013) Long-Term Treatment of Thalidomide Ameliorates Amyloid-Like Pathology through Inhibition of  $\beta$ -Secretase in a Mouse Model of Alzheimer's Disease. PLoS ONE 8(2): e55091. doi:10.1371/journal.pone.0055091

**Editor:** Zhongcong Xie, Massachusetts General Hospital, United States of America

**Received:** November 26, 2012; **Accepted:** December 21, 2012; **Published:** February 6, 2013

**Copyright:** © 2013 He et al. This is an open-access article distributed under the terms of the Creative Commons Attribution License, which permits unrestricted use, distribution, and reproduction in any medium, provided the original author and source are credited.

**Funding:** This work is supported by grants from National Institutes of Health: NIA025888 (YS) and NIAR01AG032441 (RL), Alzheimer Association: IIRG-09-61521 (YS) and IIRG-07-59510 (RL); AHAF: G2006-118 (RL) and A2008-642 (PH); and NSFC 81100861 (XC). The funders had no role in study design, data collection and analysis, decision to publish, or preparation of the manuscript.

**Competing Interests:** Matthias Staufenbiel is employed by Novartis Pharm Ltd. APP23 transgenic (20 males and 20 females in each age group) and non-transgenic wild type (20 males and 20 females in each age group) genotypes in our experiment are on the C57BL/6 background, which were provided by Novartis Institute for Biomedical Research. There are no patents, products in development or marketed products to declare. This does not alter the authors' adherence to all the PLOS ONE policies on sharing data and materials, as detailed online in the guide for authors.

\* E-mail: yshen@rfdn.org

## Introduction

Originally, thalidomide was introduced as an effective tranquilizer and painkiller that is associated with significant teratogenic property in human beings. It has been reported that thalidomide reduces the rate of TNF $\alpha$  synthesis through enhancing the degradation of transcript [1,2]. As a well-known TNF $\alpha$  inhibitor, thalidomide has clinically been re-introduced in recent years [3]. Nowadays, the drug is used to treat the patients with erythema nodosum leprosum [4,5] due to the inhibition property of inflammation and the subjects with multiple myeloma [6,7,8] because of anti-angiogenic activity by inhibiting cell proliferation of endothelial cells.

Inflammation in the brains has emerged as a significant contributor to the neurodegenerative process in AD [9]. TNF $\alpha$  is one of the most prominent pro-inflammatory cytokines and plays a central role in initiating and sustaining the cytokine cascade during inflammatory responses. TNF $\alpha$  is synthesized as a transmembrane 26-kDa precursor protein (pro-TNF $\alpha$ ) which is proteolytically

cleaved to a soluble 17-kDa TNF $\alpha$ . Subsequently, soluble TNF $\alpha$  forms a non-covalently linked homotrimer. Both soluble and transmembrane-bound TNF $\alpha$  have biological functions by binding to two different receptor subtypes of TNF receptor I and II (TNFR1 and TNFR2), respectively. In the brains, TNF $\alpha$  is primarily generated by microglia [10] and astrocytes [11]. In some circumstances some of neuron populations synthesize and secrete TNF $\alpha$  as well [12]. Elevated TNF $\alpha$  levels are observed in the serum [13,14] and the post-mortem brains [15,16] of AD patients as well as APP transgenic mice [17,18,19,20]. The elevation is correlated with disease progression in patients with severe AD [14]. It has been reported that TNF $\alpha$  gene polymorphisms is associated with an increased risk of AD [21]. Microglia activation is associated with enhanced TNF $\alpha$  prior to symptomatic stages of AD pathology in transgenic AD mice [10]. Besides TNF $\alpha$  level increase, we also found that TNFR1 levels are elevated in the brains of AD patients [22]. Hence, targeting TNF $\alpha$ /TNFR1 signals may be a beneficial strategy in AD with neuroinflammation [23,24].

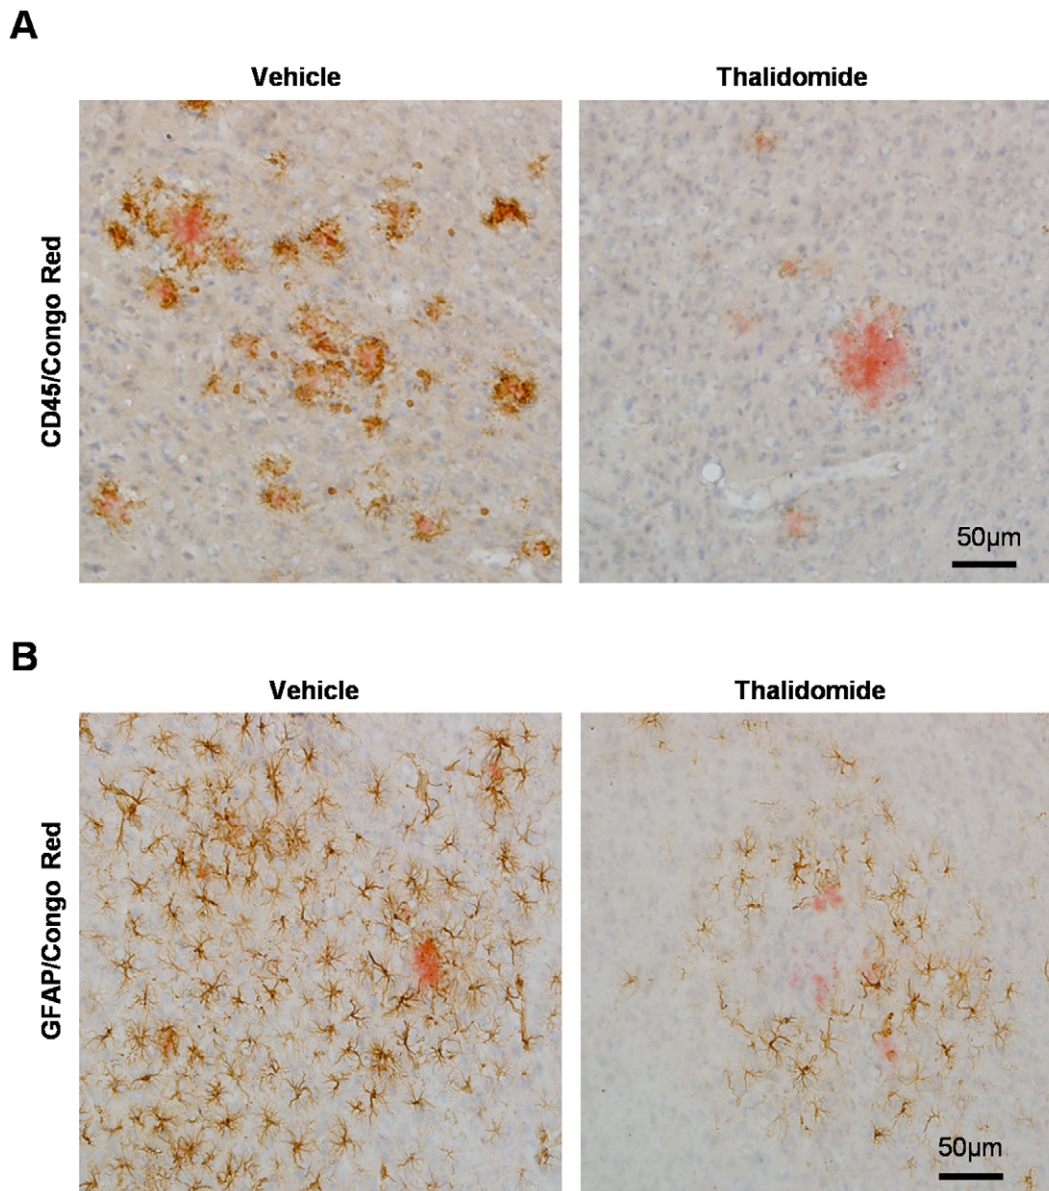

**Figure 1. Thalidomide reduces glial activation.** Senile plaques were demonstrated by Congo Red (Red). Representative images showed activated CD45-positive microglia around plaques. The number of activated microglia around similar size of plaques was obviously decreased with thalidomide administration compared to age-matched vehicle groups (**A**). Similarly, microphotographic images showed that thalidomide administration obviously decreased the number of GFAP-immunoreactive positive astrocytes around amyloid plaques (**B**). Counter staining was performed by haematoxylin. Bars: 50  $\mu$ m (**A**, **B**). doi:10.1371/journal.pone.0055091.g001

Inhibiting  $\text{TNF}\alpha$  ameliorates amyloid-associated pathology, prevents the progressive loss of neurons and at last improves cognitive deficits in AD [25,26,27]. Recently, we found that genetic deletion of  $\text{TNFRI}$  inhibits  $\text{A}\beta$  generation through decreasing  $\text{BACE1}$  levels and activity [28], implicating  $\text{TNF}\alpha/\text{TNFRI}/\text{NF-}\kappa\text{B}$  signaling pathway in  $\text{BACE1}$  regulation. Therefore, we wonder whether thalidomide could reduce amyloid loads by modulating  $\text{BACE1}$ . Here, we found that chronic administration of thalidomide could greatly decrease glial activation and  $\text{A}\beta$  generation in brains of APP23 transgenic mice. More interestingly, the decreased neuropathological effects by thalidomide are through inhibition of  $\text{BACE1}$ .

## Materials and Methods

### Animals

All animal experiments were performed in compliance with a protocol approved by the Institutional Animal Care and Use Committee (IACUC) of Roskamp Institute. APP23 transgenic (20 males and 20 females in each age group) and non-transgenic wild type (20 males and 20 females in each age group) genotypes in our experiment are on the C57BL/6 background, which were provided by Novartis Institute for Biomedical Research and the mice express mutated human  $\beta\text{APP}$  (Swedish double mutation, KM670/671NL) under neuron-specific murine Thy-1 promoter element [29,30]. APP23 and non-transgenic wild type mice were crossed and the progenies were genotyped and characterized as

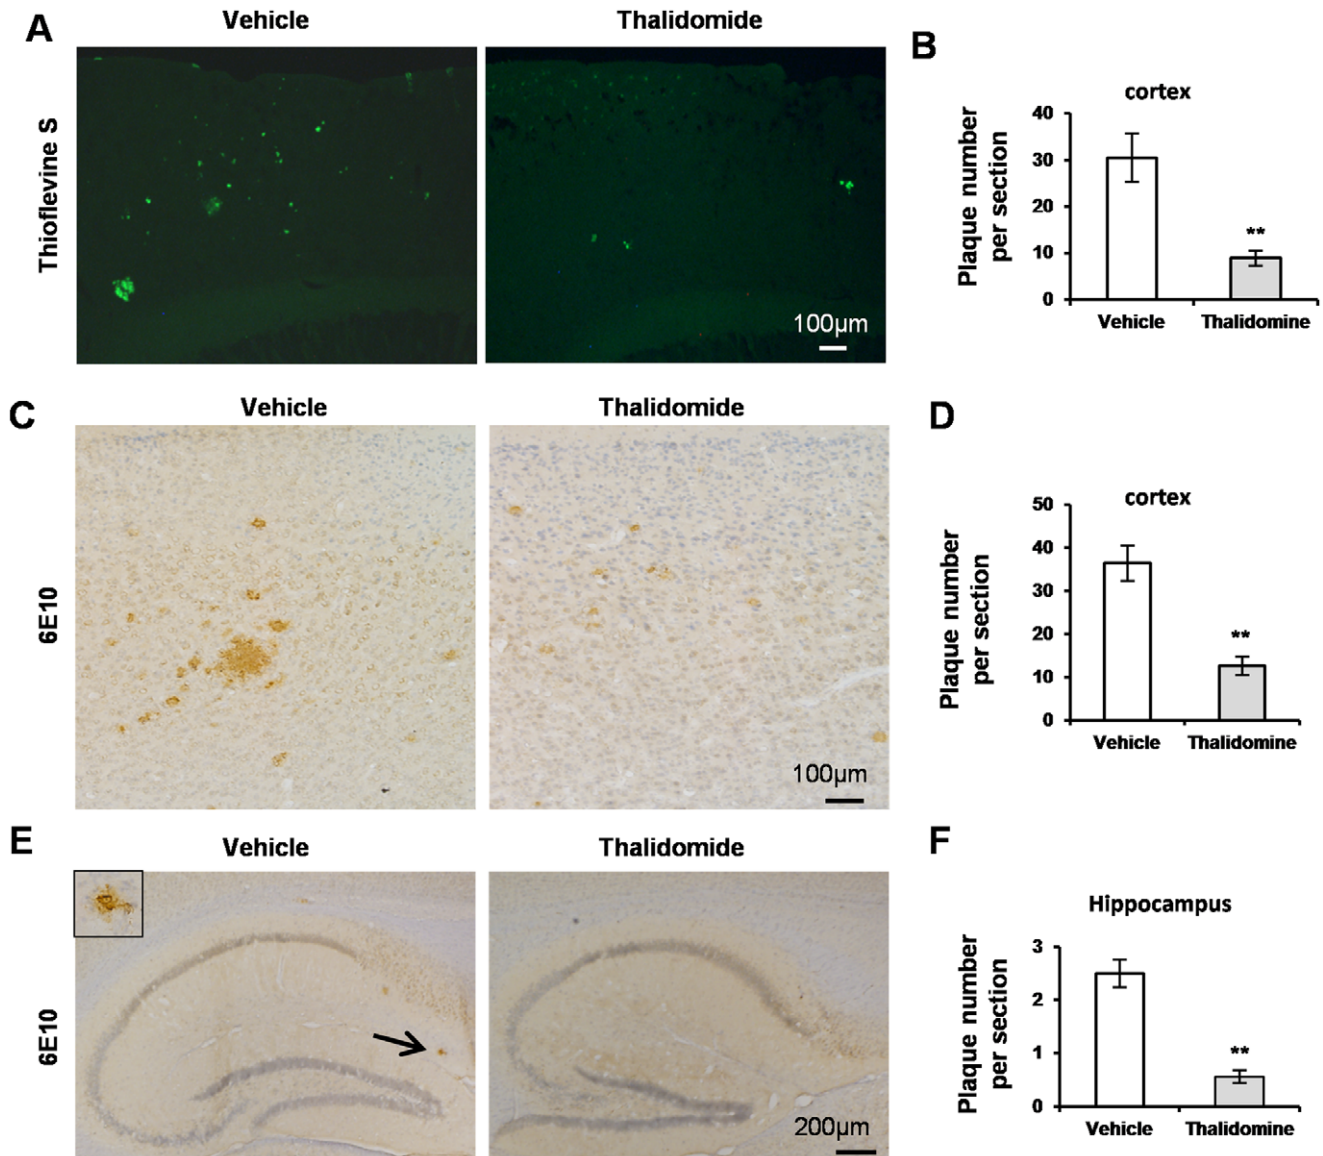

**Figure 2. Thalidomide meliorates A $\beta$  pathology.** Representative images showed positive structures of thioflavine S staining, which confirms insoluble A $\beta$  deposits, in the neocortex of 12-month-old APP23 mice with or without thalidomide application for 3 months (A). Thioflavine-positive plaques were counted and statistical analysis showed a significant decrease in the thioflavine-positive number of the neocortex along with thalidomide application vs vehicle group (Mean  $\pm$  SD,  $**p < 0.01$ , Student *t*-test,  $n = 10$  each group) (B). Microphotographic images presented senile plaques which were confirmed by immunostaining of antibody against A $\beta$ 1-17 (Clone: 6E10) in the neocortex (C) and hippocampus (E). Counter staining was performed by haematoxylin. Insert in (E) showed an amplified 6E10-positive plaque pointed by the arrow. Statistical analysis demonstrated a significant decrease in the number of 6E10-positive plaques in the neocortex (D) and hippocampus (F) (Mean  $\pm$  SD,  $**p < 0.01$ , Student *t*-test,  $n = 10$  each group) following thalidomide administration. Bar: 100  $\mu$ m (A, C), 200  $\mu$ m (E). doi:10.1371/journal.pone.0055091.g002

APP23 with PCR followed by Western blot for brain APP protein, resulting littermates used in experiments [28].

### Thalidomide Administration

APP23 transgenic mice used in this project express mutated human  $\beta$ APP (Swedish double mutation) under neuron-specific murine Thy-1 promoter element. A $\beta$  deposits or A $\beta$  plaques start to appear in the APP23 mouse brain at 9 months old (an onset of visible plaque deposits) and there are tremendous amount of A $\beta$  production/deposit and A $\beta$  plaques in the APP23 mouse brains at 12 months old. Therefore, our strategy was to treat thalidomide from the beginning of AD-like pathology, which may be at

a similar stage of “MCI” or “mild AD”. For observation of long-term effects on AD-like pathological formation, thalidomide was administered from the age of 9th to 12th month (total three months). For the purpose of short-term observation, thalidomide was applied for 3 days at the age of 12 months old. Mice were intraperitoneally administered once a day either with a dose of 100 mg/kg thalidomide (Catalog: T144; Sigma-Aldrich) suspended in 0.5% w/v carboxymethylcellulose sodium (CMC, C9481, Sigma-Aldrich) in PBS or with 0.5% CMC alone [31,32]. This dose of thalidomide was applied as a half of the quantity usually used in cancer-related studies in mice [33], which reduces potential side effects observed in long-term thalidomide

treatment. The treatment protocol for thalidomide is well tolerated by the animals [32,34]. At the end of the injection period, mice were perfused with PBS supplemented 10U heparin. The brains were withdrawn and the left half of the brains was fixed with 4% paraformaldehyde for histological analysis, and the right half was frozen on dry ice for biochemical analysis.

### ELISA

$A\beta_{1-40}$  and  $A\beta_{1-42}$  ELISA quantification was performed as described previously [28,35,36]. The neocortex of experimental subjects was isolated and homogenized in M-PER mammalian protein extraction reagent (catalog: 78503, Thermo scientific) and centrifuged at 14,000 g at 4°C for 1 h. Protein concentration was measured by protein assays (Bio-Rad Laboratories) following

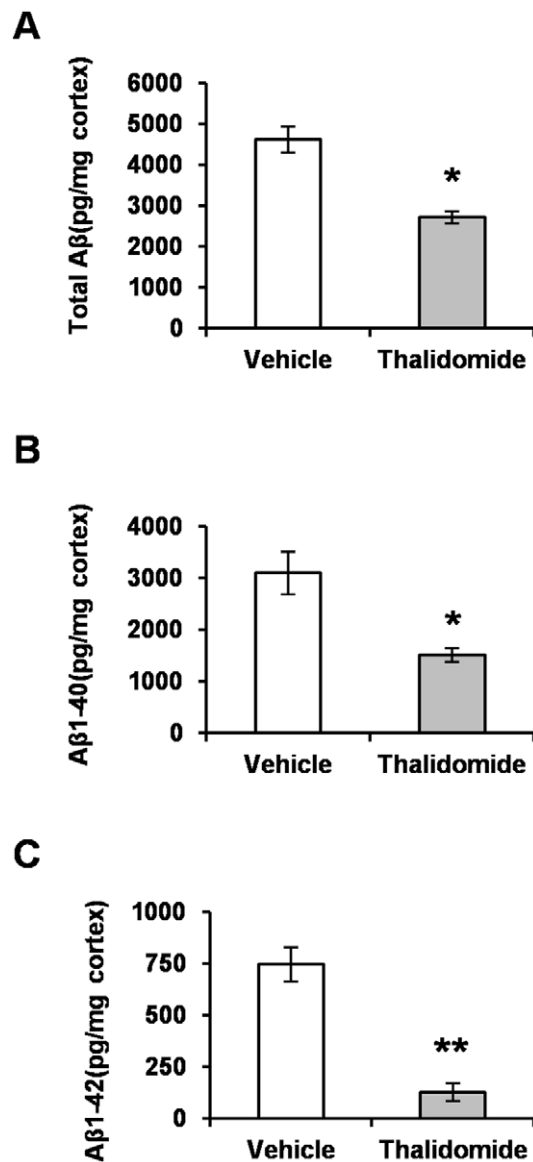

**Figure 3. Thalidomide reduces A $\beta$  load.** ELISA analysis revealed a decrease in the amount of total A $\beta$  (A), insoluble A $\beta_{1-40}$  (B) and A $\beta_{1-42}$  (C), which was calculated as picogram per milligram of protein in the neocortex of APP23 mice exposed 100 mg/kg of thalidomide for 3 months (Mean  $\pm$  SD, \* $p$ <0.05, \*\* $p$ <0.01, Students  $t$ -test,  $n$ =10 each group).

doi:10.1371/journal.pone.0055091.g003

manufacturer's instruction. The pellet with insoluble A $\beta$  was dissolved in 98% of formic acid and centrifuged at 4°C for 30 min. The supernatant from the pellet was collected for the assay of insoluble A $\beta_{1-40}$  and A $\beta_{1-42}$ . The levels of A $\beta_{1-40}$  and A $\beta_{1-42}$  were measured with an A $\beta_{1-40}$  and A $\beta_{1-42}$  ELISA kit (KHB3481 and KHB3544, Invitrogen). The ELISA system has been extensively tested and no cross-reactivity between A $\beta_{1-40}$  and A $\beta_{1-42}$  was observed. The quantification of insoluble A $\beta$  ELISA measurement was normalized to corresponding tissue protein concentration. Data were presented as Mean  $\pm$  SD of four experiments.

### BACE1 Activity

An aliquot of brain homogenates was further lysed with a lysis buffer described as previously [28]. Briefly, BACE1 enzymatic activity was analyzed by using synthetic peptide substrates containing BACE1 cleavage site (BVI Substrate, a Lucifer Yellow labeled peptide, Catalog: #565781, Calbiochem). BACE1 substrate was dissolved in DMSO and mixed with HAc buffer (100 mM HAc and 100 mM NaCl, pH 4.5). An equal amount of protein was mixed with 100  $\mu$ l of substrate. The fluorescence intensity was measured with a microplate reader (Bio-Rad laboratories) at an excitation wavelength of 430 nm and an emission wavelength of 520 nm. The average velocities were calculated and relative velocities were plotted in comparison with vehicle samples (100%).

### Western Blot

Western blot was performed as described previously [28]. The neocortex from mice ( $n$ =10 each group, 5 males and 5 females) was homogenized in M-PER mammalian protein extraction reagent (catalog: 78503, Thermo Scientific) supplemented with Halt protease and phosphatase inhibitor single-use cocktail (Catalog: 78442, Thermo Scientific). The supernatants were directly separated on 8% SDS-PAGE and transferred to polyvinylidene fluoride (PVDF) membrane using wet transfer equipment at 90 mA overnight (Bio-Rad Laboratories). Following the transfer onto PVDF membranes a blockade with 5% dry milk was performed in Tris Buffer Saline (TBS). The membranes were incubated with primary antibodies overnight: rabbit polyclonal antibody against C-terminal fragment of APP (catalog: #171610, clone: 751-770, Calbiochem), monoclonal mouse anti-BACE1 antibody (MAB931, clone: 137612, 1:1000, R&D Systems), rabbit anti-N-terminal BACE1 (B0806, clone: 485-501, Sigma-Aldrich), mouse anti-human soluble  $\beta$  APP (Swedish mutation) (sAPP $\beta$ , catalog: 10321, Clone: A61, 1:1000, IBL-America), rabbit anti-insulin degrading enzyme (IDE, N-terminal 97-273, catalog: PC730, 1:2000, Oncogene Research Products), rabbit anti-nephrilysin (NEP, Neutral endopeptidase, MAB5458, 1:2000, Millipore Bioscience Research Reagents), rabbit anti-presenilin 1 (PS-1, 1:2000, gift by Dr. Selkoe), rabbit anti-APH-1 (1:2000, gift by Dr. Yueming Li) and rabbit anti-nicastrin (**N1660, 1:2000, Sigma-Aldrich**). Corresponding goat anti-mouse or rabbit IgG HRP-conjugated secondary antibodies (SC-2004 and SC-2055; Santa-Cruz Biotechnology, Santa Cruz, CA) were applied. The membranes were developed with SuperSignal West Femto Maximum Sensitivity Substrate (Catalog: 34095, Thermo Scientific) and the chemiluminescent image signal was detected and captured by ChemiDoc XRS (Bio-Rad Laboratories). After stripping in the strip solution, membranes were re-probed with a mouse anti- $\beta$ -actin antibody (A1978; clone AC-15, Sigma-Aldrich). For quantification purposes, the densitometry of the protein signals was measured using Quantity One software (Version 4.6.0, Bio-Rad Laboratories). The ratio of protein signals versus (vs) corresponding  $\beta$ -actin signal was calculated and the

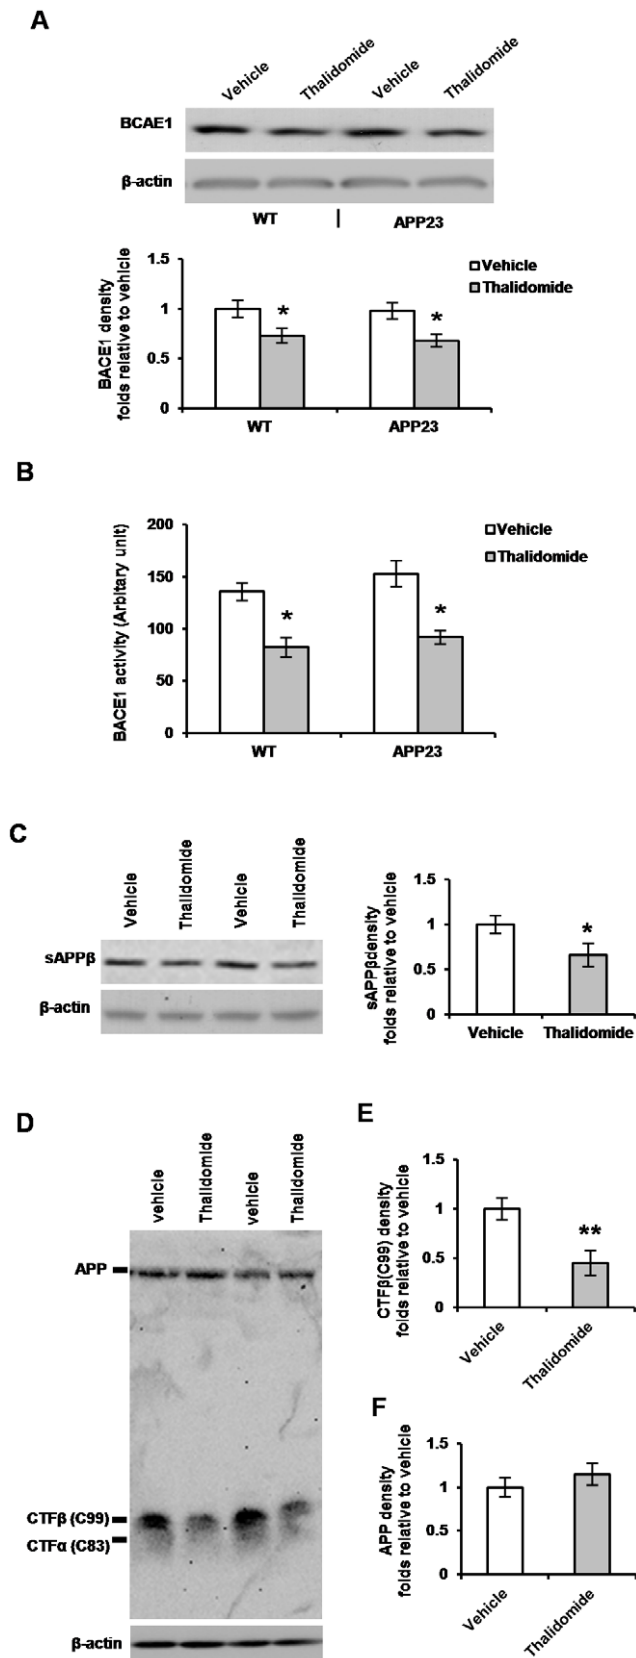

**Figure 4. Thalidomide lowers BACE1 and reduces  $\beta$ -site cleavage of APP.** Representative images of Western blots showed  $\beta$ -secretase enzyme BACE1 bands in WT and littermate APP23 mice with/without thalidomide administration (A) and a significant decrease

in BACE1 amount was found with thalidomide application (A, Mean  $\pm$  SD,  $*p < 0.05$ , ANOVA test,  $n = 10$  each group). BACE1 activity was normalized to the input protein amount and indicated as an arbitrary unit. The activity was measured and a lower activity of BACE1 was found with thalidomide application (B, Mean  $\pm$  SD,  $*p < 0.05$ , ANOVA test,  $n = 10$  each group). Representative images of Western blots showed an amount decrease of sAPP $\beta$  secretion (C) and the density of bands significantly reduced in the thalidomide treated APP23 mice compared to littermate vehicle groups (C, Mean  $\pm$  SD,  $*p < 0.05$ , Student's *t*-test,  $n = 10$  each group). Microphotographic images of APP-CTF fragments showed an amount decrease of C99 following thalidomide administration (D). The density of bands was measured with a significant decrease in C99 fragments (E) but not significant changes of APP levels compared to vehicle groups (F) (Mean  $\pm$  SD,  $**p < 0.01$ , Student's *t*-test,  $n = 10$  each group). doi:10.1371/journal.pone.0055091.g004

results were expressed as density folds of the experimental group ratio to that of vehicle group, accordingly.

### Histology and Immunostaining Assay

The subject mice ( $n = 6$  each group) were perfused via 0.1 M Phosphate Buffer (PB) supplemented with 10 U of heparin. The half brain was harvested and post-fixed in 4% paraformaldehyde (PFA). Serial sagittal sections (30  $\mu$ m) were generated using Leica CM3000 cryostat. To observe the fibrillary aggregation of  $\beta$ -sheet amyloid, the sections were incubated in thioflavine S (T1892, 1:5000, Sigma-Aldrich). To test A $\beta$  accumulation as well as glial activation, immunostaining was performed as described previously [28,37]. Sections were penetrated with 0.015% Triton X-100 and were blocked with 10% horse or goat serum. The primary antibodies were applied with monoclonal antibody against A $\beta$  amino acid sequence 1–17 (MAB1560, clone 6E10, 1:2000, Millipore Bioscience Research Reagents, Billerica, MA), rabbit anti-glial fibrillary acidic protein (GFAP) for test of astrocyte activation (Z0334, 1:5000, DAKO) and rat anti-CD45 for microglial activation (MCA1388, 1:500, AbD, Serotec). Biotinylated secondary antibodies against rabbit IgG or mouse IgG were used (1:1,000; Vector Lab). Counter staining was performed with Mayer's Hematoxylin Solution (MHS32, Sigma-Aldrich) for 1 min. Congo red binds to fibril proteins enriched in  $\beta$ -sheet conformation as a histological dye for amyloid detection [38]. To examine whether glial activation is associated with A $\beta$  aggregation, Congo Red (0.5% w/v, Catalog: C6277, Sigma-Aldrich) was applied for 5 min.

### Quantification of Immunoreactive Structures

Quantification was carried out by an experimenter blind to the study as described previously [28]. Immunostaining was performed with sections per interval of 400  $\mu$ m. A microscope (DMLS; Leica) with a 10 $\times$  N PLAN and 20 $\times$  and 40 $\times$  PL FLUOTAR was used. Digitized images were captured with a DEI-470 digital camera (Optronics, Goleta, CA) on a Leica microscope (Leica, Germany). MagnaFire software (version 2.1C; Optronics) was used. The immunopositive structures of each section were counted with same parameter. In general, 9–11 sections through the hippocampus formation per mouse were calculated ( $n = 10$  mice each group). The number of immune-positive structures was totaled and expressed per section.

### Statistical Analyses

Results were expressed as Mean  $\pm$  SD. All analyses were performed using a software program (SPSS version 11.5.1; SPSS). Two groups were assessed using Student's *t* tests. Three groups or more were analyzed with variance models (ANOVA). The level of significance was  $p \leq 0.05$ .

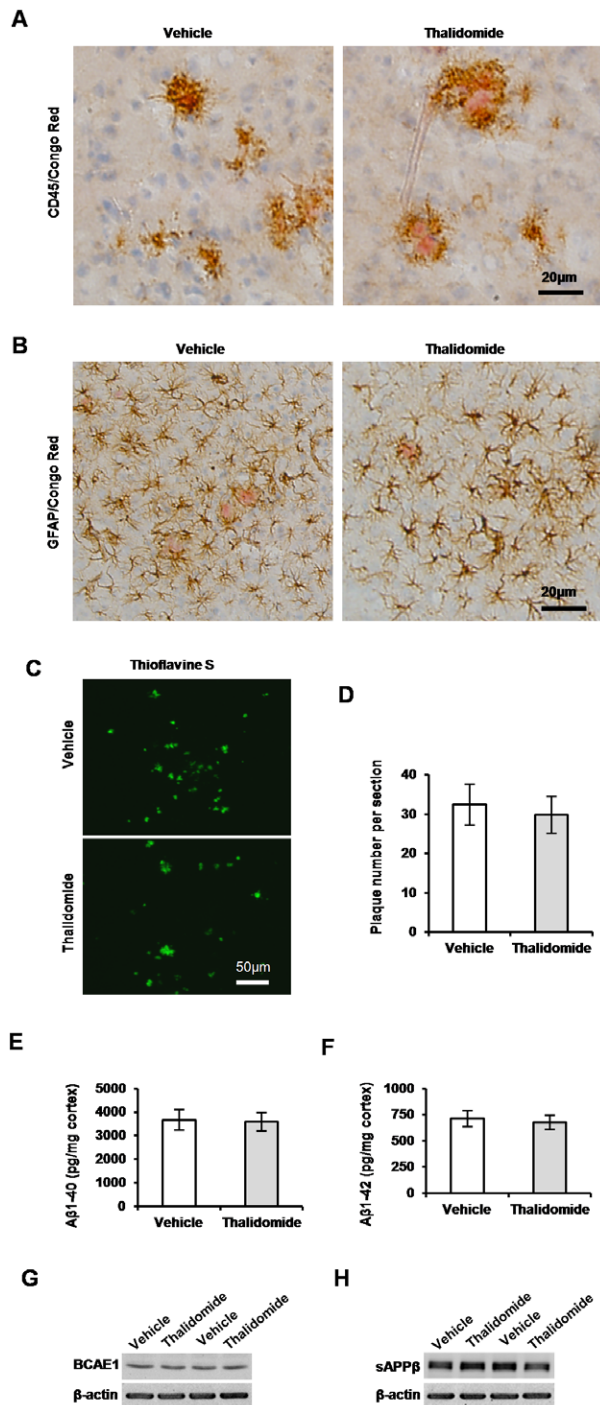

**Figure 5. Short-term thalidomide has little effects on AD-like pathology and BACE1 regulation.** Thalidomide was administered for 3 days in 12-month-old APP23 mice. The examination was performed similar to that in the brains of APP23 mice treated with thalidomide for 3 months. Images showed that there is not obvious decrease in the number of activated CD45<sup>+</sup> microglia (A) and GFAP<sup>+</sup> astrocytes (B) around plaques in the neocortex (confirmed by Congo Red). Counter staining by haematoxylin. Bars: 20  $\mu$ m. **Figure 7. Thalidomide does not affect amyloid degradation enzyme levels.** NEP and IDE, which are responsible for clearance of  $\beta$  amyloid, were measured by Western blot in WT and littermate APP23 mice in the absence or presence of thalidomide. Representative results were shown in (A) and (C), respectively. There were no significant changes in the amount of NEP (B) and IDE (D) expression between vehicle and

thalidomide application (Mean  $\pm$  SD, ANOVA test,  $p > 0.05$ ,  $n = 10$  each group).

doi:10.1371/journal.pone.0055091.g005

## Results

### Thalidomide Decreases Glial Activation

A large number of activated microglia and astrocytes around neuritic plaques is also a hallmark of A $\beta$  neuropathological progression [39,40,41]. CD45 is a marker for microglia activation in response to the content of inflammation in the brains [39,40,41]. To observe microglia activation along with thalidomide administration in APP23 mice, immunostaining against CD45 was performed. Results showed a weak immunoreactivity and decreased microglial number around similar size of plaques, confirmed by Congo Red, in the neocortex in the presence of thalidomide compared to vehicles (Fig. 1A). GFAP is well-characterized marker for astrocyte activation in the brains. To examine whether the thalidomide application could alleviate the astrocyte activation of APP23 mice, the immunostaining of GFAP was performed. We found activated astrocytes around plaques identified by Congo Red (Fig. 1B). The number of activated astrocytes around similar size of plaques was reduced in the brains of APP23 mice with thalidomide administration, in comparison with vehicle groups (Fig. 1B). These results indicate that chronic thalidomide administration could alleviate inflammation reaction in APP23 mice.

### Thalidomide Decreases $\beta$ Amyloid Pathology

To evaluate  $\beta$  amyloid (A $\beta$ ) pathology in the brains, thioflavine S, which binds to  $\beta$  sheet-rich fibril amyloid protein aggregates [42], was applied to observe whether a reduced protein aggregation could be seen in the brains in the presence of thalidomide. Results showed much less thioflavine S staining in thalidomide treated APP23 mice compared to vehicle groups (Fig. 2A). Accurate quantification in the cortex indicated 63% less number of plaques with thalidomide administration (Fig. 2B). To further confirm the results from thioflavine S staining, immunostaining was performed with antibody 6E10 recognizing A $\beta$ 1-17 fragment [43,44]. Immune-positive plaques in the neocortex were shown in Fig. 2C. The plaque number was counted and a significant decrease was observed following thalidomide administration (Fig. 2D,  $**p < 0.01$ ). Similarly, representative images of the immunostaining against A $\beta$  in the hippocampus were shown in Fig. 2E. In the group of thalidomide application the plaque number was reduced by 43% (Fig. 2F). These data strongly indicate that amyloid protein aggregation is alleviated in the presence of thalidomide.

### Thalidomide Decreases A $\beta$ Levels

To further confirm the decrease in A $\beta$  burden along with thalidomide administration, we wonder whether thalidomide reduces A $\beta$  pathology by affecting A $\beta$  generation. We measured total A $\beta$  and A $\beta$ <sub>1-42</sub>, A $\beta$ <sub>1-40</sub> levels, the two primary A $\beta$  species in amyloid plaques [45,46,47] by sandwich ELISAs ( $n = 10$  each group) [28,36]. The pellets (detergent insoluble fraction) from brain tissue homogenization were re-suspended with formic acid. Quantitatively, ELISA results showed that total A $\beta$  were significantly decreased by 41% ( $2718 \pm 145$  pg/mg in the presence of thalidomide vs  $4619 \pm 319$  pg/mg in the vehicle groups) (Fig. 3A). Both insoluble A $\beta$ <sub>1-40</sub> and A $\beta$ <sub>1-42</sub> were significantly decreased by 51% ( $1513 \pm 133$  pg/mg of thalidomide groups vs  $3098 \pm 412$  pg/mg of the vehicles, Fig. 3B) and by 83% ( $746 \pm 82$  pg/mg vs  $129 \pm 43$  pg/mg, Fig. 3C), respectively. These

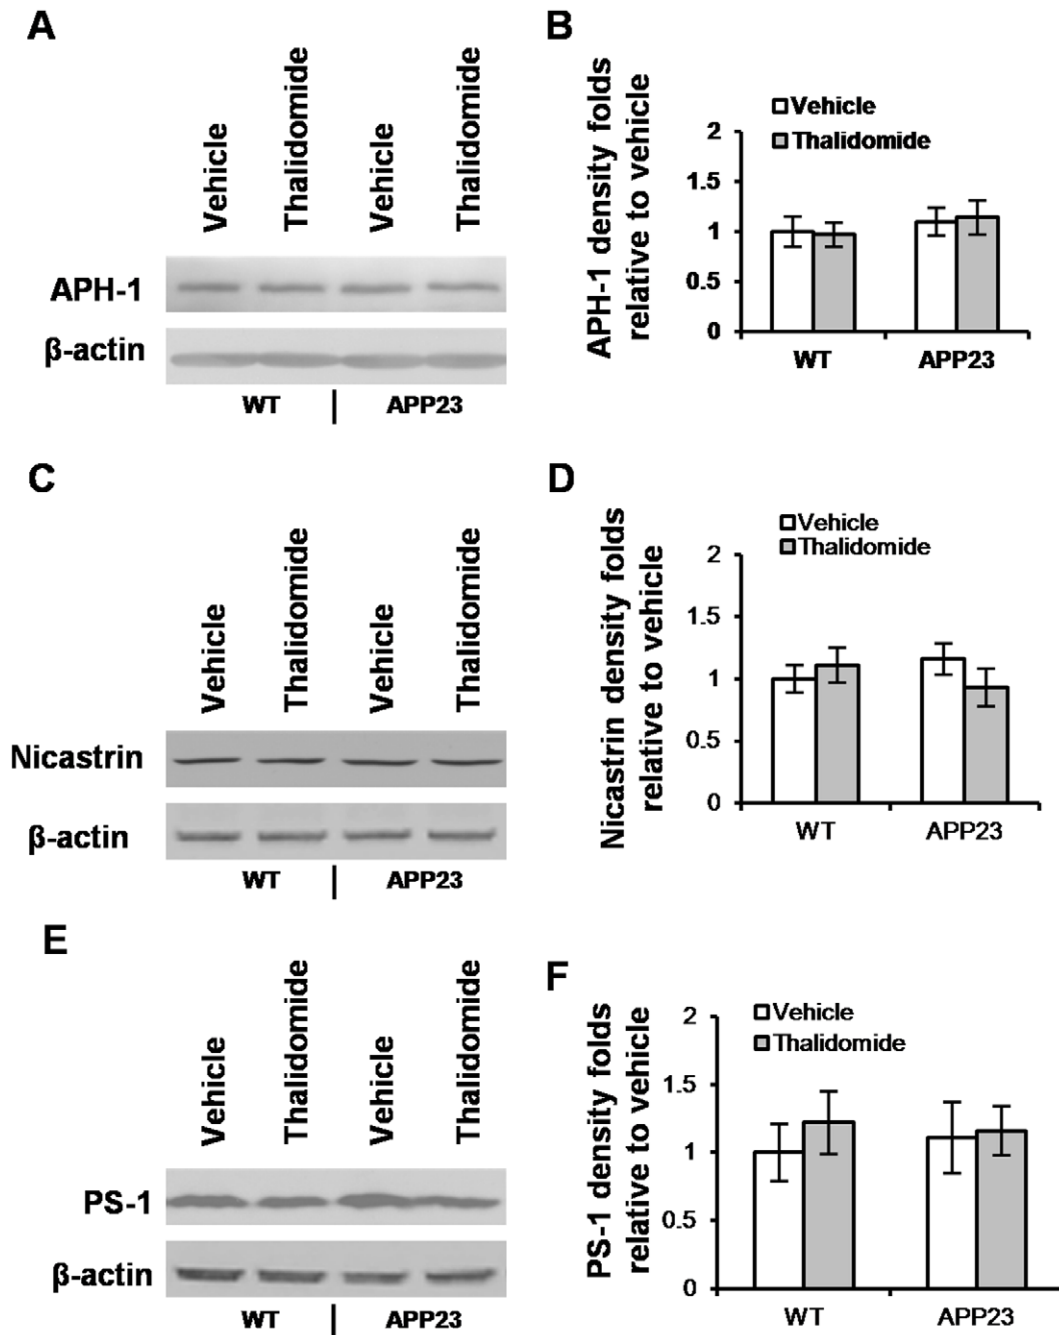

**Figure 6. Thalidomide has little affect  $\gamma$ -secretase components.** The  $\gamma$ -secretase components were probed with Western blot in WT and littermates APP23 mice with/without thalidomide administration. Representative images showed APH (A), Nicastrin (C) and PS-1 (E). Density analyses showed no significant changes of APH-1 levels (B), nicastrin (D) and PS-1 (F) with thalidomide application compared to vehicle groups (Mean  $\pm$  SD, ANOVA test,  $p > 0.05$ ,  $n = 10$  each group). doi:10.1371/journal.pone.0055091.g006

results suggest that the amount reduction in  $A\beta_{1-40}$  and  $A\beta_{1-42}$  could account for the alleviated  $A\beta$  pathology in APP23 mice chronically treated with thalidomide.

#### Thalidomide Down-regulates BACE1 and Lowers Amyloidogenic Processing of APP

$\beta$ -Secretase (BACE1) is a type I transmembrane aspartyl protease, which is responsible for  $\beta$ -site amyloid- $\beta$  precursor protein (APP) cleavage and is found to cleave APP at the N-

terminal position of  $A\beta$  [43,48,49,50,51]. To examine whether the reduced amyloidosis in thalidomide-treated APP23 mice is caused by a reducing APP metabolism, Western blot was used to probe BACE1 expression level in the brains of age-matched WT and APP23 mice with/without thalidomide application (Fig. 4A). We found a significant decrease of BACE1 protein levels in the presence of thalidomide when compared to vehicle groups (Fig. 4A). Whether the BACE1 activity is also changed in APP23 mice in the presence of thalidomide still is unknown. We

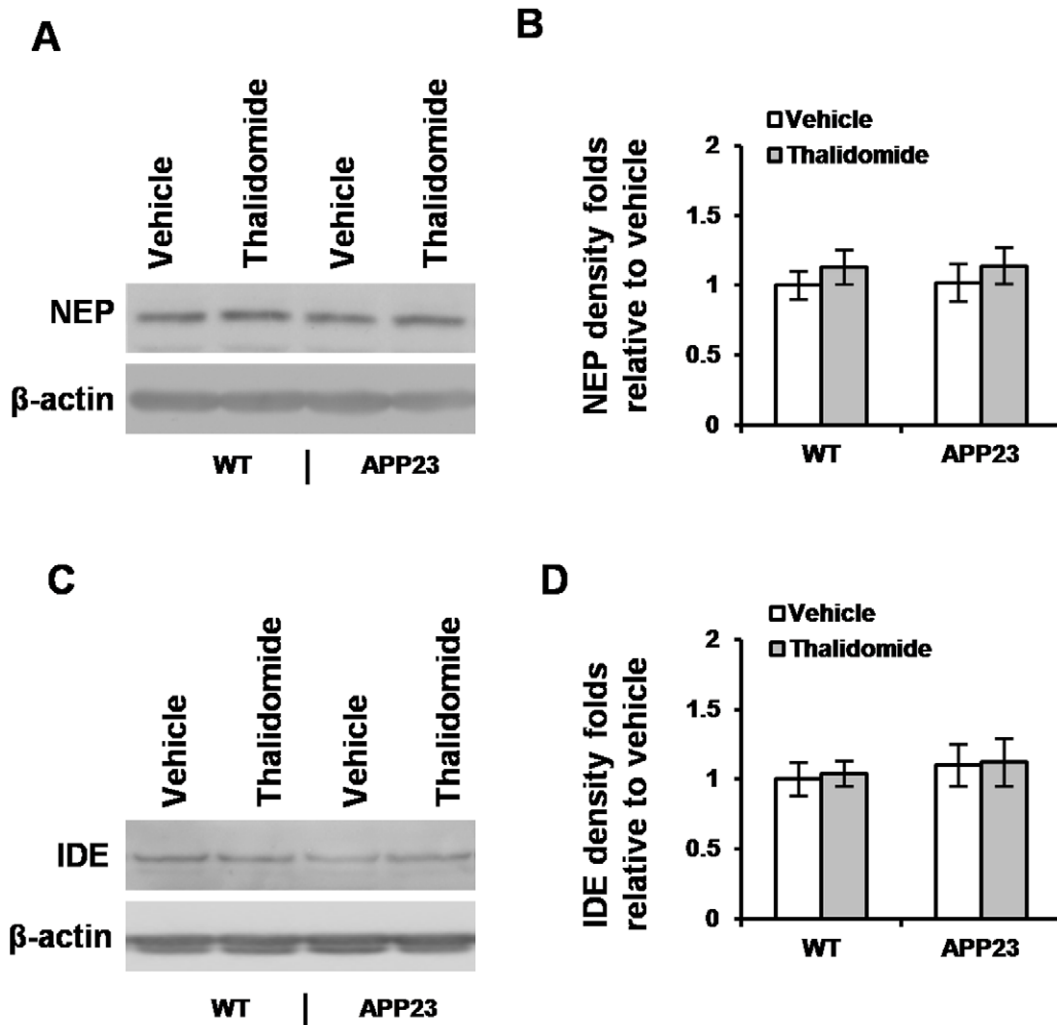

**Figure 7. Thalidomide does not affect amyloid degradation enzyme levels.** NEP and IDE, which are responsible for clearance of  $\beta$  amyloid, were measured by Western blot in WT and littermate APP23 mice in the absence or presence of thalidomide. Representative results were shown in (A) and (C), respectively. There were no significant changes in the amount of NEP (B) and IDE (D) expression between vehicle and thalidomide application (Mean  $\pm$  SD, ANOVA test,  $p > 0.05$ ,  $n = 10$  each group). doi:10.1371/journal.pone.0055091.g007

used an MCA-labeled BACE1 substrate [52,53] to test the BACE1 activity ( $n = 10$  for each group). We observed a significant decrease in BACE1 activity with thalidomide treatment (Fig. 4B). These results suggest that decreased BACE1 activity by thalidomide is due to a reduction in the protein levels.

The cleavage of APP occurs through BACE1 or  $\alpha$ -secretase. Proteolytic enzyme BACE1 cleaves APP to produce a secreted soluble human mutant APP $\beta$  (sAPP $\beta$ ) and carboxyl-terminal fragment  $\beta$  (CTF $\beta$  or C99) [47,54];  $\alpha$ -secretase cleavage produces a secreted soluble APP $\alpha$  (sAPP $\alpha$ ) and carboxyl-terminal fragment  $\alpha$  (CTF $\alpha$  or C83). To examine whether the reduced amyloidosis in the presence of thalidomide may be caused by a reduction in APP metabolism, we at first observed the secretion levels of sAPP $\beta$  fragments by Western blot (Fig. 4C). We found a significant decrease of sAPP $\beta$  levels in the thalidomide-treated APP23 mice (Fig. 4C,  $*p < 0.05$ ). To further confirm that BACE1 cleavage was decreased following thalidomide administration, CTF $\beta$  (C99) fragment of BACE1 processing was tested by Western blot (Fig. 4D). The density of probing bands was measured. We found a significant reduction of C99 levels in APP23 mice treated with

thalidomide compared to the vehicles (Fig. 4E). However, we did not find significant changes of APP protein levels between the groups of vehicle and thalidomide administration (Fig. 4F).

#### Short-term Thalidomide has Little Effects on Glial Activation, A $\beta$ Generation and BACE1 Activity

A reduced glial activation was observed with 3-month (long-term) administration of thalidomide (Fig. 1). Whether the activation decrease could occur with a short-term application of thalidomide is still not clear, we intraperitoneally administered thalidomide with the same dose once a day for 3 days in 12-month-old APP23 mice. Similarly, the activation was observed with immunostaining of antibody against CD45 (microglia) and GFAP (astrocyte). Results showed no obvious different activation of either microglia (Fig. 5A) or astrocytes (Fig. 5B), suggesting that short-term administration of thalidomide could not help inflammatory reduction as we observed by long-term administration of thalidomide (Fig. 2). Moreover, we further determined whether a short-term application of the drug could decrease A $\beta$  plaque number. Following 3-day administration, the evaluation of



plaque number was performed with thioflavine S staining (**Fig. 5C**) and we did not find a significant difference of plaque number in the brains in the presence of acute thalidomide treatment vs vehicle groups (**Fig. 5D**). Although no significant decrease in plaque number, there is a possibility that a decreased amount of A $\beta$  burden might still occur. Both A $\beta_{1-40}$  and A $\beta_{1-42}$  levels was measured by sandwich ELISAs ( $n=10$  each group) [28,36]. Results showed no significant decrease in insoluble levels of both A $\beta_{1-40}$  (**Fig. 5E**) and A $\beta_{1-42}$  (**Fig. 5F**) with the short-term presence of thalidomide vs vehicle groups.

To test whether short-term thalidomide treatment can alter BACE1 expression, western blot was performed. Expectedly, we did not find any changes of BACE1 protein levels in the presence and absence of short-term thalidomide (**Fig. 5G**). To further confirm the result of not changing BACE1 activity with the short-term thalidomide application, we examined the secretion levels of sAPP $\beta$  fragments to observe the  $\beta$ -site cleavage of APP. Similarly, we did not find a significant decrease of sAPP $\beta$  levels in the short-term thalidomide-treated APP23 mice (**Fig. 5H**). These results suggest that thalidomide is not directly involved the modulation of BACE1.

### Thalidomide has Little Effect on $\gamma$ -secretase Components

Carboxyl-terminal fragment (CTF $\beta$  or C99) of BACE1 processing can be further cleaved by  $\gamma$ -secretase, giving rise to A $\beta$  [55]. Next, we examined the expressions of  $\gamma$ -secretase components: APH-1, nicastrin and PS-1, which cleave the C-terminals of A $\beta$ . The protein expression was probed by Western blot (**Fig. 6A, C, E**) and we did not observe the obvious changes of APH-1, nicastrin and PS-1 expression in the presence of thalidomide (**Fig. 6B, D, F**) compared to responding vehicle groups, respectively.

### Thalidomide has Little Effect on A $\beta$ Clearance Enzymes

Thalidomide-induced A $\beta$  reduction could also be due to an increase in A $\beta$  degradation/clearance activity instead of A $\beta$  production. The enzymes, insulin degradation enzyme (IDE) and nerilysin (NEP), which are relevant to A $\beta$  degradation and clearance [56], were assessed. Western blot analyses did not show significant differences in either IDE or NEP levels between the presence of thalidomide and vehicle groups ( $n=10$  in each group) (**Fig. 7A–D**). The results indicate that thalidomide-induced reduction of A $\beta$  levels is not associated with A $\beta$  clearance and degradation of enzymes IDE and/or NEP.

## Discussion

In this study, this is the first report that long-term treatment of thalidomide could decrease activated cell number of microglia and astrocytes, which is consistent with previous report [57]. The activated inhibition of glial cells might be due to a decreased stimulation by downgrading A $\beta$  deposits or by thalidomide-lowering TNF $\alpha$  levels. However, the reduced glial activation cannot be observed following a short-term treatment of thalidomide. It is postulated that with short-term treatment of thalidomide (1) there is no significant decrease in A $\beta$  accumulation and therefore the stimulation by A $\beta$  cannot be reduced; (2) the existence of glial activation induced by A $\beta$  cannot be inactivated because of reduced TNF $\alpha$  levels caused by thalidomide.

Meanwhile, A $\beta$  levels was reduced with chronic thalidomide treatment in this study, consistent with the recent report that 3,6'-dithiothalidomide, an isosteric analog of thalidomide, slows A $\beta$  amount in neuronal cytoplasm of AD transgenic mice for 24 days [25,26]. Senile neuritic plaques are a hallmark of AD brains

[47,58]. Here, we observed a decreased number of A $\beta$  deposit plaques with chronic application of thalidomide but not with a short-term treatment. It indicates that thalidomide needs to be applied at a long term for preventative and therapeutic purposes.

BACE1 is a stress-response protein [59]. We [52,53] and other groups [60,61] found an increased BACE1 levels and/or activity in the brains of AD patients. BACE1 activity is also up-regulated by various factors, such as age, a primary risk factor for AD [62], inflammatory cytokine interferon  $\gamma$  [63], oxidative stress NO [64] and free radicals [65]. In the present study, we further demonstrated that inhibition of TNF $\alpha$  by thalidomide administration lowers BACE1 levels and activity and therefore ameliorates amyloid pathology. However, we did not find the down-regulation of BACE1 and its cleavage following a short-term treatment of thalidomide. It suggests that thalidomide regulates BACE1 through at least a modulator and plays the role by an indirect mechanism. Our previous experiments showed that *TNFR1* deletion could directly down-regulate BACE1 transcription through NF- $\kappa$ B [28,52,66]. We also found TNFR1 level increase in the brains of AD patients [22]. These results strongly indicate that TNF $\alpha$ /TNFR1 is involved in the up-regulation of BACE1 activity. Here we cannot exclude the possibility that the down-regulation of BACE1 activity induced by long-term thalidomide treatment results from a reduction in BACE1 protein levels. Further activity assay is needed to base on the equal levels of BACE1 protein instead of total proteins extracted from the brains of thalidomide treatment and vehicles.

BACE1-cleavage of APP is the rate-limiting step in A $\beta$  production and pathogenesis of AD brains [46,67]. Modulation in these BACE1-regulating proteins leads to changes in A $\beta$  levels and pathogenesis in the brains of AD patients. Thus, BACE1 has been considered as a prime target for A $\beta$ -lowering strategy in the prevention and intervention of AD. Besides searching for the inhibitors that directly target BACE1 [68,69], targeting BACE1 modulators may be an alternative path to the therapeutics of AD.

Thalidomide is an immunomodulatory drug which is a brain-permeant small molecule inhibitor of TNF $\alpha$  [1,2]. The inflammation inhibition of thalidomide extends survival in a transgenic mouse model of amyotrophic lateral sclerosis [70]. Regarding the little effects of thalidomide on  $\gamma$ -secretase as shown in the present study, *in vitro* studies demonstrated that the increase of  $\gamma$ -secretase activity requires up-regulation of four components: PS-1, APH-1, nicastrin and pen-2 in cell culture [71]. Our results *in vivo* showed that thalidomide has little effects on the expressions of three components: PS-1, APH-1, nicastrin in transgenic APP23 mice. The experiment did not include the observation of Pen-2 protein levels with thalidomide treatment. Even though Pen-2 could potentially be regulated by thalidomide, it would not change  $\gamma$ -secretase activity *in vivo*.

Meanwhile, our experimental results showed no significant differences in terms of the responses (BACE1 and A $\beta$ ) to thalidomide treatment in the brains between males and females of APP23 mice (data not shown). Moreover, it has been reported that thalidomide might partially prevent recognition impairment by A $\beta$  toxicity [72]. In the present study we revealed that chronic administration of thalidomide dramatically decreased glial activation and A $\beta$  neuropathology in the brains of an AD-like transgenic mouse model. The thalidomide-induced A $\beta$  load reduction was caused by inhibition of BACE1. Re-introduction of thalidomide might ignite a promising aspect in immunological and inflammatory diseases such as neurodegenerative diseases [25,73]. This is one of significances of using thalidomide as a potential treatment for AD. Our recent NIH supported phase II clinical trial by using thalidomide to treat AD patients is on-going [74]. If the clinical

trial of thalidomide in AD patients works, it would provide an alternative approach to treat AD. Regarding the side effects of thalidomide, especially the issues for pregnant women, AD patients are selected at above 70 years old.

## References

- Moreira AL, Sampaio EP, Zmuidzinis A, Frindt P, Smith KA, et al. (1993) Thalidomide exerts its inhibitory action on tumor necrosis factor alpha by enhancing mRNA degradation. *J Exp Med* 177: 1675–1680.
- Sampaio EP, Sarno EN, Galilly R, Cohn ZA, Kaplan G (1991) Thalidomide selectively inhibits tumor necrosis factor alpha production by stimulated human monocytes. *J Exp Med* 173: 699–703.
- Melchert M, List A (2007) The thalidomide saga. *Int J Biochem Cell Biol* 39: 1489–1499.
- Walker SL, Waters MF, Lockwood DN (2007) The role of thalidomide in the management of erythema nodosum leprosum. *Lepr Rev* 78: 197–215.
- Mazzocchi L, Cadoso SH, Amarante GW, de Souza MV, Domingues R, et al. (2012) Novel thalidomide analogues from diamines inhibit pro-inflammatory cytokine production and CD80 expression while enhancing IL-10. *Biomed Pharmacother* 66: 323–329.
- Nair RR, Gebhard AW, Emmons MF, Hazlehurst LA (2012) Emerging strategies for targeting cell adhesion in multiple myeloma. *Adv Pharmacol* 65: 143–189.
- Weber D, Rankin K, Gavino M, Delasalle K, Alexanian R (2003) Thalidomide alone or with dexamethasone for previously untreated multiple myeloma. *J Clin Oncol* 21: 16–19.
- Aragon-Ching JB, Li H, Gardner ER, Figg WD (2007) Thalidomide analogues as anticancer drugs. *Recent Pat Anticancer Drug Discov* 2: 167–174.
- Maccioni RB, Rojo LE, Fernandez JA, Kuljis RO (2009) The role of neuroimmunomodulation in Alzheimer's disease. *Ann N Y Acad Sci* 1153: 240–246.
- Janelins MC, Mastrangelo MA, Oddo S, LaFerla FM, Federoff HJ, et al. (2005) Early correlation of microglial activation with enhanced tumor necrosis factor-alpha and monocyte chemoattractant protein-1 expression specifically within the entorhinal cortex of triple transgenic Alzheimer's disease mice. *J Neuroinflammation* 2: 23.
- Lieberman AP, Pitha PM, Shin HS, Shin ML (1989) Production of tumor necrosis factor and other cytokines by astrocytes stimulated with lipopolysaccharide or a neurotropic virus. *Proc Natl Acad Sci U S A* 86: 6348–6352.
- Janelins MC, Mastrangelo MA, Park KM, Sudol KL, Narrow WC, et al. (2008) Chronic neuron-specific tumor necrosis factor-alpha expression enhances the local inflammatory environment ultimately leading to neuronal death in 3xTg-AD mice. *Am J Pathol* 173: 1768–1782.
- Alvarez A, Cacabelos R, Sanpedro C, Garcia-Fantini M, Alexandre M (2007) Serum TNF-alpha levels are increased and correlate negatively with free IGF-I in Alzheimer disease. *Neurobiol Aging* 28: 533–536.
- Paganelli R, Di Iorio A, Patricelli L, Ripani F, Sparvieri E, et al. (2002) Proinflammatory cytokines in sera of elderly patients with dementia: levels in vascular injury are higher than those of mild-moderate Alzheimer's disease patients. *Exp Gerontol* 37: 257–263.
- Akiyama H, Barger S, Barnum S, Bradt B, Bauer J, et al. (2000) Inflammation and Alzheimer's disease. *Neurobiol Aging* 21: 383–421.
- Tarkowski E, Andreassen N, Tarkowski A, Blennow K (2003) Intrathecal inflammation precedes development of Alzheimer's disease. *J Neurol Neurosurg Psychiatry* 74: 1200–1205.
- Patel NS, Paris D, Mathura V, Quadros AN, Crawford FC, et al. (2005) Inflammatory cytokine levels correlate with amyloid load in transgenic mouse models of Alzheimer's disease. *J Neuroinflammation* 2: 9.
- Mehlhorn G, Hollborn M, Schliebs R (2000) Induction of cytokines in glial cells surrounding cortical beta-amyloid plaques in transgenic Tg2576 mice with Alzheimer pathology. *Int J Dev Neurosci* 18: 423–431.
- Sly LM, Krzesicki RF, Brashler JR, Buhl AE, McKinley DD, et al. (2001) Endogenous brain cytokine mRNA and inflammatory responses to lipopolysaccharide are elevated in the Tg2576 transgenic mouse model of Alzheimer's disease. *Brain Res Bull* 56: 581–588.
- Munch G, Apelt J, Rosemarie Kientsch E, Stahl P, Luth HJ, et al. (2003) Advanced glycation endproducts and pro-inflammatory cytokines in transgenic Tg2576 mice with amyloid plaque pathology. *J Neurochem* 86: 283–289.
- McCusker SM, Curran MD, Dyanan KB, McCullagh CD, Urquhart DD, et al. (2001) Association between polymorphism in regulatory region of gene encoding tumour necrosis factor alpha and risk of Alzheimer's disease and vascular dementia: a case-control study. *Lancet* 357: 436–439.
- Cheng X, Yang L, He P, Li R, Shen Y (2010) Differential activation of tumor necrosis factor receptors distinguishes between brains from Alzheimer's disease and non-demented patients. *J Alzheimers Dis* 19: 621–630.
- Frankola KA, Greig NH, Luo W, Tweedie D (2011) Targeting TNF-alpha to elucidate and ameliorate neuroinflammation in neurodegenerative diseases. *CNS Neurol Disord Drug Targets* 10: 391–403.
- Shen Y, He P, Zhong Z, McAllister C, Lindholm K (2006) Distinct destructive signal pathways of neuronal death in Alzheimer's disease. *Trends Mol Med* 12: 574–579.
- McAlpine FE, Lee JK, Harms AS, Ruhn KA, Blurton-Jones M, et al. (2009) Inhibition of soluble TNF signaling in a mouse model of Alzheimer's disease prevents pre-plaque amyloid-associated neuropathology. *Neurobiol Dis* 34: 163–177.
- Tweedie D, Ferguson RA, Fishman K, Frankola KA, Van Praag H, et al. (2012) Tumor necrosis factor-alpha synthesis inhibitor 3,6'-dithiothalidomide attenuates markers of inflammation, Alzheimer pathology and behavioral deficits in animal models of neuroinflammation and Alzheimer's disease. *J Neuroinflammation* 9: 106.
- Gabbita SP, Srivastava MK, Eslami P, Johnson MF, Kobritz NK, et al. (2012) Early intervention with a small molecule inhibitor for tumor necrosis factor-alpha prevents cognitive deficits in a triple transgenic mouse model of Alzheimer's disease. *J Neuroinflammation* 9: 99.
- He P, Zhong Z, Lindholm K, Berning L, Lee W, et al. (2007) Deletion of tumor necrosis factor death receptor inhibits amyloid beta generation and prevents learning and memory deficits in Alzheimer's mice. *J Cell Biol* 178: 829–841.
- Sturchler-Pierrat C, Abramowski D, Duke M, Wiederhold KH, Mistl C, et al. (1997) Two amyloid precursor protein transgenic mouse models with Alzheimer disease-like pathology. *Proc Natl Acad Sci U S A* 94: 13287–13292.
- Sommer B, Staufenbiel M (1998) A beta peptide deposition in the brains of transgenic mice: evidence for a key event in Alzheimer's disease pathogenesis. *Mol Psychiatry* 3: 284–286, 282–283.
- Ryu JK, McLarnon JG (2008) Thalidomide inhibition of perturbed vasculature and glial-derived tumor necrosis factor-alpha in an animal model of inflamed Alzheimer's disease brain. *Neurobiol Dis* 29: 254–266.
- Kenyon BM, Browne F, D'Amato RJ (1997) Effects of thalidomide and related metabolites in a mouse corneal model of neovascularization. *Exp Eye Res* 64: 971–978.
- Daruwalla J, Nikfarjam M, Malcontenti-Wilson C, Muralidharan V, Christophi C (2005) Effect of thalidomide on colorectal cancer liver metastases in CBA mice. *J Surg Oncol* 91: 134–140.
- Kaicker S, McCrudden KW, Beck L, New T, Huang J, et al. (2003) Thalidomide is anti-angiogenic in a xenograft model of neuroblastoma. *Int J Oncol* 23: 1651–1655.
- He P, Shen Y (2009) Interruption of beta-catenin signaling reduces neurogenesis in Alzheimer's disease. *J Neurosci* 29: 6545–6557.
- Kuo YM, Beach TG, Sue LI, Scott S, Layne KJ, et al. (2001) The evolution of A beta peptide burden in the APP23 transgenic mice: implications for A beta deposition in Alzheimer disease. *Mol Med* 7: 609–618.
- Matsuoka Y, Picciano M, Malester B, LaFrancois J, Zehr C, et al. (2001) Inflammatory responses to amyloidosis in a transgenic mouse model of Alzheimer's disease. *Am J Pathol* 158: 1345–1354.
- Frid P, Anisimov SV, Popovic N (2007) Congo red and protein aggregation in neurodegenerative diseases. *Brain Res Rev* 53: 135–160.
- Yan Q, Zhang J, Liu H, Babu-Khan S, Vassar R, et al. (2003) Anti-inflammatory drug therapy alters beta-amyloid processing and deposition in an animal model of Alzheimer's disease. *J Neurosci* 23: 7504–7509.
- Wilcock DM, Rojiani A, Rosenthal A, Levkowitz G, Subbarao S, et al. (2004) Passive amyloid immunotherapy clears amyloid and transiently activates microglia in a transgenic mouse model of amyloid deposition. *J Neurosci* 24: 6144–6151.
- Simard AR, Soulet D, Gowing G, Julien JP, Rivest S (2006) Bone marrow-derived microglia play a critical role in restricting senile plaque formation in Alzheimer's disease. *Neuron* 49: 489–502.
- LeVine H, 3rd (1999) Quantification of beta-sheet amyloid fibril structures with thioflavin T. *Methods Enzymol* 309: 274–284.
- Vassar R, Bennett BD, Babu-Khan S, Kahn S, Mendiaz EA, et al. (1999) Beta-secretase cleavage of Alzheimer's amyloid precursor protein by the transmembrane aspartic protease BACE. *Science* 286: 735–741.
- Van Dooren T, Muylaert D, Borghgraef P, Cresens A, Devijver H, et al. (2006) Neuronal or glial expression of human apolipoprotein e4 affects parenchymal and vascular amyloid pathology differentially in different brain regions of double- and triple-transgenic mice. *Am J Pathol* 168: 245–260.
- Gandy S (2005) The role of cerebral amyloid beta accumulation in common forms of Alzheimer disease. *J Clin Invest* 115: 1121–1129.
- Hardy J, Selkoe DJ (2002) The amyloid hypothesis of Alzheimer's disease: progress and problems on the road to therapeutics. *Science* 297: 353–356.
- Bertram L, Tanzi RE (2008) Thirty years of Alzheimer's disease genetics: the implications of systematic meta-analyses. *Nat Rev Neurosci* 9: 768–778.
- Sinha S, Anderson JP, Barbour R, Basi GS, Caccavello R, et al. (1999) Purification and cloning of amyloid precursor protein beta-secretase from human brain. *Nature* 402: 537–540.
- Hussain I, Powell D, Howlett DR, Tew DG, Meek TD, et al. (1999) Identification of a novel aspartic protease (Asp 2) as beta-secretase. *Mol Cell Neurosci* 14: 419–427.

## Author Contributions

Examined and analyzed the data: PH YS. Conceived and designed the experiments: YS RL. Performed the experiments: PH XC. Contributed reagents/materials/analysis tools: MS. Wrote the paper: PH YS RL.

50. Yan R, Bienkowski MJ, Shuck ME, Miao H, Tory MC, et al. (1999) Membrane-anchored aspartyl protease with Alzheimer's disease beta-secretase activity. *Nature* 402: 533–537.
51. Lin X, Koelsch G, Wu S, Downs D, Dashti A, et al. (2000) Human aspartyl protease memapsin 2 cleaves the beta-secretase site of beta-amyloid precursor protein. *Proc Natl Acad Sci U S A* 97: 1456–1460.
52. Li R, Lindholm K, Yang LB, Yue X, Citron M, et al. (2004) Amyloid beta peptide load is correlated with increased beta-secretase activity in sporadic Alzheimer's disease patients. *Proc Natl Acad Sci U S A* 101: 3632–3637.
53. Yang LB, Lindholm K, Yan R, Citron M, Xia W, et al. (2003) Elevated beta-secretase expression and enzymatic activity detected in sporadic Alzheimer disease. *Nat Med* 9: 3–4.
54. Selkoe DJ (2011) Resolving controversies on the path to Alzheimer's therapeutics. *Nat Med* 17: 1060–1065.
55. Zhang C, Khandelwal PJ, Chakraborty R, Cuellar TL, Sarangi S, et al. (2007) An AICD-based functional screen to identify APP metabolism regulators. *Mol Neurodegener* 2: 15.
56. Malito E, Hulse RE, Tang WJ (2008) Amyloid beta-degrading cryptidases: insulin degrading enzyme, presequence peptidase, and neprilysin. *Cell Mol Life Sci* 65: 2574–2585.
57. Fonseca MI, Ager RR, Chu SH, Yazan O, Sanderson SD, et al. (2009) Treatment with a C5aR antagonist decreases pathology and enhances behavioral performance in murine models of Alzheimer's disease. *J Immunol* 183: 1375–1383.
58. Palop JJ, Mucke L (2010) Amyloid-beta-induced neuronal dysfunction in Alzheimer's disease: from synapses toward neural networks. *Nat Neurosci* 13: 812–818.
59. Cole SL, Vassar R (2008) The role of amyloid precursor protein processing by BACE1, the beta-secretase, in Alzheimer disease pathophysiology. *J Biol Chem* 283: 29621–29625.
60. Fukumoto H, Cheung BS, Hyman BT, Irizarry MC (2002) Beta-secretase protein and activity are increased in the neocortex in Alzheimer disease. *Arch Neurol* 59: 1381–1389.
61. Holsinger RM, McLean CA, Beyreuther K, Masters CL, Evin G (2002) Increased expression of the amyloid precursor beta-secretase in Alzheimer's disease. *Ann Neurol* 51: 783–786.
62. Fukumoto H, Rosene DL, Moss MB, Raju S, Hyman BT, et al. (2004) Beta-secretase activity increases with aging in human, monkey, and mouse brain. *Am J Pathol* 164: 719–725.
63. Hong HS, Hwang EM, Sim HJ, Cho HJ, Boo JH, et al. (2003) Interferon gamma stimulates beta-secretase expression and sAPPbeta production in astrocytes. *Biochem Biophys Res Commun* 307: 922–927.
64. Pak T, Cadet P, Mantione KJ, Stefano GB (2005) Morphine via nitric oxide modulates beta-amyloid metabolism: a novel protective mechanism for Alzheimer's disease. *Med Sci Monit* 11: BR357–366.
65. Tamagno E, Bardini P, Obbili A, Vitali A, Borghi R, et al. (2002) Oxidative stress increases expression and activity of BACE in NT2 neurons. *Neurobiol Dis* 10: 279–288.
66. Yang L, Lindholm K, Konishi Y, Li R, Shen Y (2002) Target depletion of distinct tumor necrosis factor receptor subtypes reveals hippocampal neuron death and survival through different signal transduction pathways. *J Neurosci* 22: 3025–3032.
67. Tanzi RE, Bertram L (2005) Twenty years of the Alzheimer's disease amyloid hypothesis: a genetic perspective. *Cell* 120: 545–555.
68. Boddapati S, Levites Y, Sierks MR (2011) Inhibiting beta-secretase activity in Alzheimer's disease cell models with single-chain antibodies specifically targeting APP. *J Mol Biol* 405: 436–447.
69. Cai J, Qi X, Kociok N, Skosyrski S, Emilio A, et al. (2012) beta-Secretase (BACE1) inhibition causes retinal pathology by vascular dysregulation and accumulation of age pigment. *EMBO Mol Med* 4: 980–991.
70. Kiaei M, Petri S, Kipiani K, Gardian G, Choi DK, et al. (2006) Thalidomide and lenalidomide extend survival in a transgenic mouse model of amyotrophic lateral sclerosis. *J Neurosci* 26: 2467–2473.
71. Kimberly WT, LaVoie MJ, Ostaszewski BL, Ye W, Wolfe MS, et al. (2003) Gamma-secretase is a membrane protein complex comprised of presenilin, nicastrin, Aph-1, and Pen-2. *Proc Natl Acad Sci U S A* 100: 6382–6387.
72. Alkam T, Nitta A, Mizoguchi H, Saito K, Seshima M, et al. (2008) Restraining tumor necrosis factor-alpha by thalidomide prevents the amyloid beta-induced impairment of recognition memory in mice. *Behav Brain Res* 189: 100–106.
73. Tweedie D, Sambamurti K, Greig NH (2007) TNF-alpha inhibition as a treatment strategy for neurodegenerative disorders: new drug candidates and targets. *Curr Alzheimer Res* 4: 378–385.
74. Sabbagh MN, Nural F, He P, Sirrel S, Belden C, et al. (2010) Rationale and strategy for thalidomide as a BACE 1 inhibitor for a phase II randomized clinical trial in mild-to-moderate Alzheimer's disease. *Alzheimers Dementia* 6.
